# Supplementary material
Source: PubMed Central journal article supplement (PMC6026346)
Supplement: mmc1.pdf [file mmc1.pdf]

**Biophysical Journal, Volume 114**

**Supplemental Information**

**Redox Modulation of Oligomeric State in Proline Utilization A**

**David A. Korasick, Ashley C. Campbell, Shelbi L. Christgen, Srinivas Chakravarthy, Tommi A. White, Donald F. Becker, and John J. Tanner**

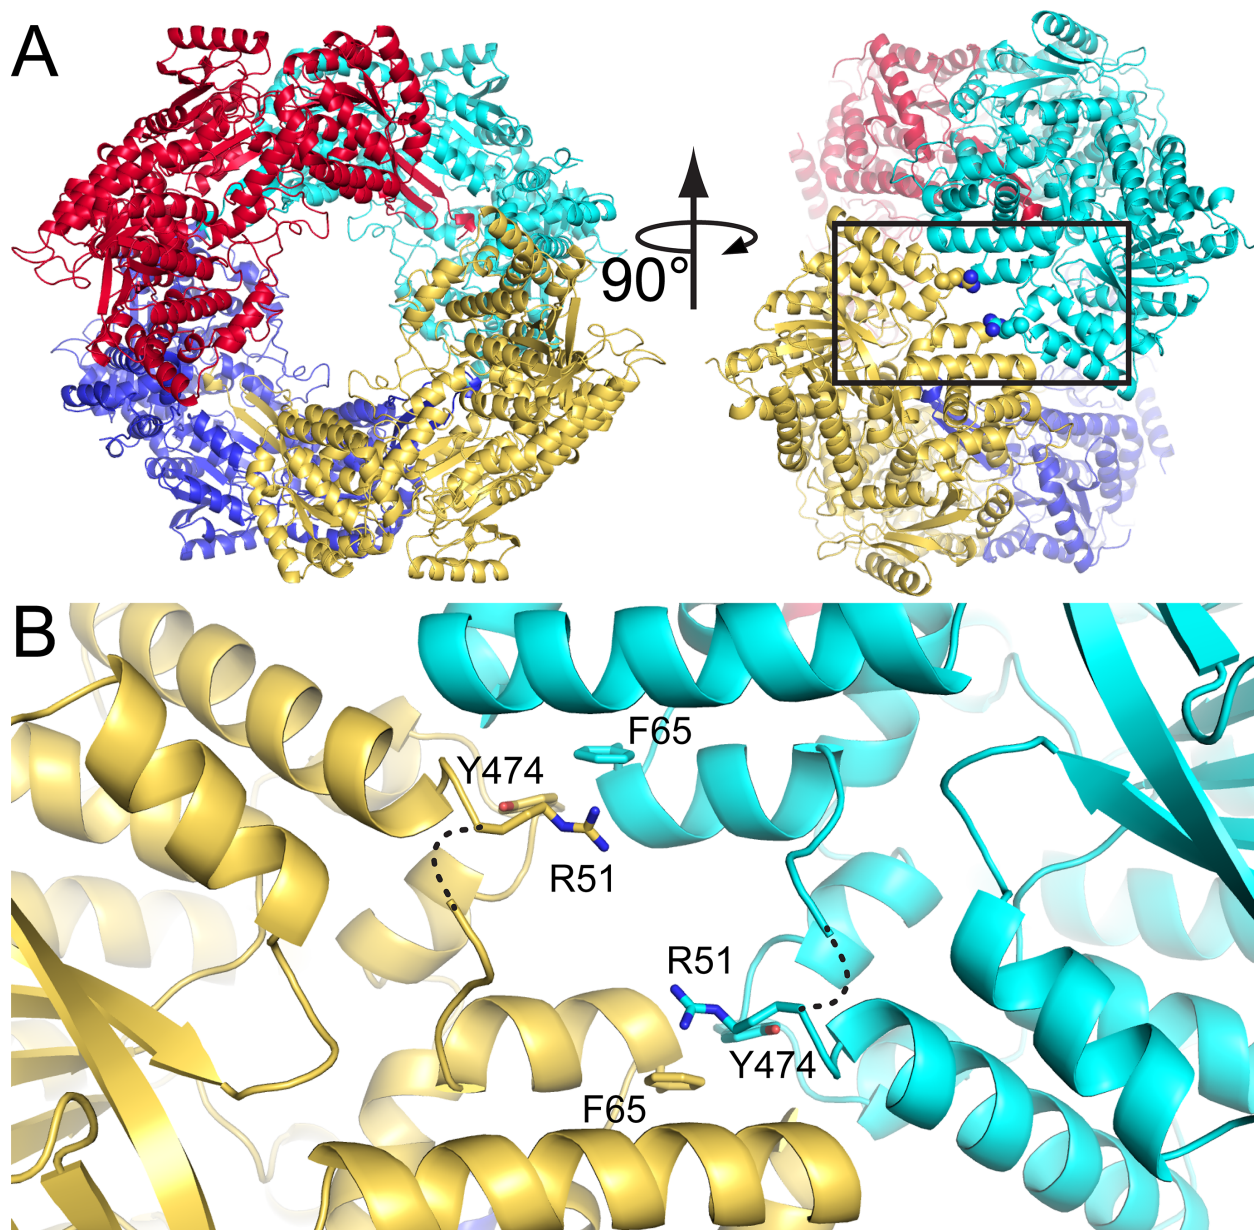

FIGURE S1 Structural context of Arg51 of BjPutA. (A) The BjPutA tetramer with the four protomers in different colors. The domain-swapped dimers are colored red-cyan and gold-blue. Arg51 is shown in spheres in the right hand image. The boxed region is expanded in panel B. (B) Close-up view of the dimer-dimer interface. The dashed curves represent disordered residues 52-53. This figure was taken from Korasick *et al.* (1).

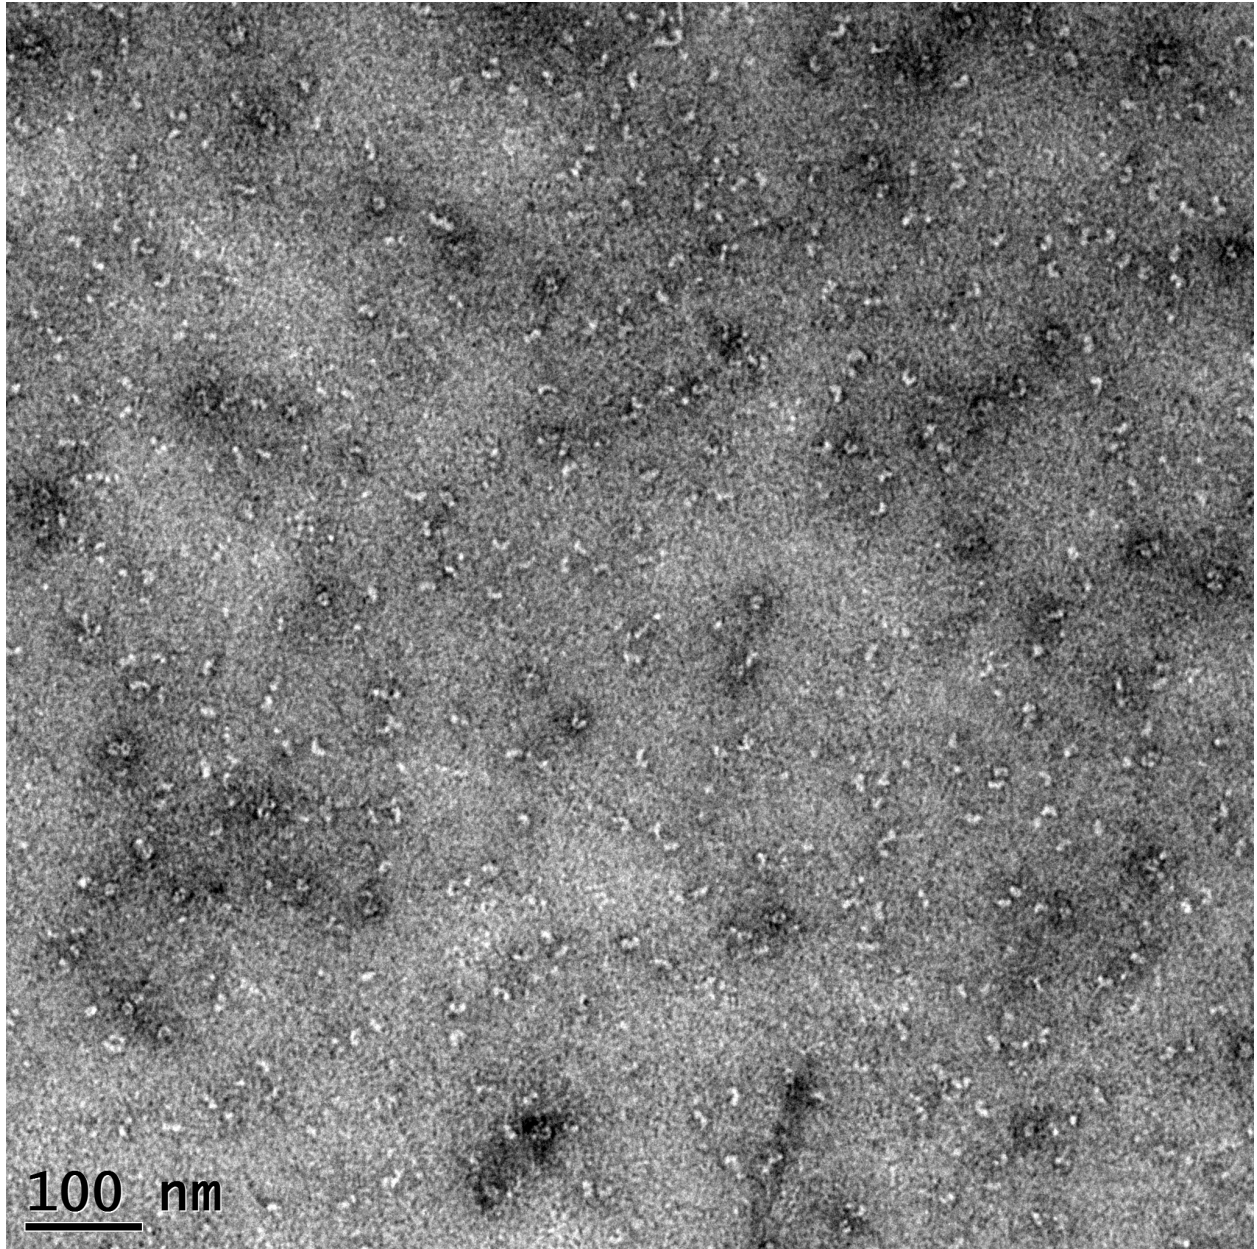

FIGURE S2 Negative-stain EM of BjPutA. An enlarged version of the electron micrograph from Fig. 2A is shown.

## Supporting References

1. Korasick, D. A., H. Singh, T. A. Pemberton, M. Luo, R. Dhatwalia, and J. J. Tanner. 2017. Biophysical investigation of type A PutAs reveals a conserved core oligomeric structure. FEBS J 284:3029-3049.
